# Supplementary material
Source: publisher figshare collection journal article supplement (https://sage.figshare.com/ndownloader/files/15051281)
Supplement: Supplementary file 1 [file 15051281]

**Data Abstraction table – publication summary columns**

| # | Citation                                                                                                                                                                                                                                    | Year | How found?            | Lead author country | Study design                                                                                                                                                                                                                                                                                                                                                                                                     | Narratives                                              | Recipients                                                                                                                                                                                                                                                            | Female/ Male   | Mean age | Ethnicity                                                                                          | Quality  |
|---|---------------------------------------------------------------------------------------------------------------------------------------------------------------------------------------------------------------------------------------------|------|-----------------------|---------------------|------------------------------------------------------------------------------------------------------------------------------------------------------------------------------------------------------------------------------------------------------------------------------------------------------------------------------------------------------------------------------------------------------------------|---------------------------------------------------------|-----------------------------------------------------------------------------------------------------------------------------------------------------------------------------------------------------------------------------------------------------------------------|----------------|----------|----------------------------------------------------------------------------------------------------|----------|
| 1 | Sheens, E., Rhoses, P., and Dawson, L. (2016) 'Encountering anorexia: challenging stigma with recovery stories', <i>Advances in Eating Disorders: Theory, Research and Practice</i> , 4, (3), pp. 315-322                                   | 2016 | Database search       | Australia           | Thematic analysis of semi-structured interviews with first year psychology students who listened to an Anorexia Nervosa recovery narrative read by a researcher (n=25)                                                                                                                                                                                                                                           | Anorexia nervosa recovery story                         | First year psychology students (n=25)                                                                                                                                                                                                                                 | F: 18<br>M: 7  | 19       | Not stated                                                                                         | Moderate |
| 2 | Thomas, J., Judge, A., Brownell, K., and Vartanian, L. (2006) 'Evaluating the effects of eating disorder memoirs on readers' eating attitudes and behaviors'. <i>International Journal of Eating Disorders</i> , 39, (5) pp. 418-425        | 2006 | Citation tracking [1] | USA                 | Quantitative study of the impact of a written eating disorder recovery narrative on female undergraduate Psychology students. Impact assessed using the Eating Attitudes Test (EAT-26), the Eating Disorders Inventory (EDI) Drive for Thinness subscale, a measure of perceived ED symptom prevalence, and an Implicit Association Test (IAT) measuring associations between anorexia and glamour/danger (n=54) | Published eating disorder memoir.                       | Female undergraduate psychology students (n=54)                                                                                                                                                                                                                       | F: 54<br>M: 0  | 20       | White: 32<br>Asian<br>American/Pacific Islander: 12<br>Black: 7<br>Hispanic 2<br>Other ethnicity 1 | Moderate |
| 3 | Shaw, LK., and Homewood, J. (2015) The effect of eating disorder memoirs in individuals with self-identified eating pathologies, <i>Journal of Nervous and Mental Disease</i> , 203, (8), pp 591-595                                        | 2015 | Database search       | Australia           | Qualitative analysis of questionnaires completed by participants who consumed eating disorder recovery narratives as part of their own recovery (n=24)                                                                                                                                                                                                                                                           | Published eating disorder memoirs.                      | Participants with prior or current eating disorder diagnosis [self-rated] (n=24)                                                                                                                                                                                      | F: 24<br>M: 0  | 25       | Not stated                                                                                         | Moderate |
| 4 | Williams, A., Fossey, E., Farhall, J., Foley, F. and Thomas, N., 2018. Recovery After Psychosis: Qualitative Study of Service User Experiences of Lived Experience Videos on a Recovery-Oriented Website. <i>JMIR Mental Health</i> , 5(2). | 2018 | Expert consultation   | Australia           | Interviews with participants who have been diagnosed with a psychotic disorder, and who have engaged with used video-based recovery narratives presented on a website as part of their recovery (n=36)                                                                                                                                                                                                           | Lived experience videos presented on a project website. | 1. over 18 years of age, current users of mental health services, diagnosis of a psychotic disorder, sufficient English proficiency to participate in an interview. (n=36)<br><br>2. had used the website for at least 3 months with their usual mental health worker | F: 24<br>M: 12 | 41       | Not stated                                                                                         | High     |
| 5 | Nurser KP, Rushworth I, Shakespeare T, et al. (2018) Personal storytelling in mental health recovery. <i>Mental Health Review Journal</i> 23: 25-36                                                                                         | 2018 | Web-searching         | UK                  | Interpretive Phenomenological Analysis of interviews with attendees of a Telling My Story course (n=8).                                                                                                                                                                                                                                                                                                          | Recovery stories told in a Telling my Story course.     | 1. aged 18 or over, with a mental health difficulty and have received support from secondary mental health services<br><br>2. had completed the TMS course within the last year. (n=8)                                                                                | F: 4<br>M: 4   | 51       | 7 white British<br><br>1 mixed White British and Asian                                             | High     |

**Data Abstraction table – items relating to impact on participants [initial source of data for refinement through narrative synthesis]**

| # | Time of impact assessment                                | Social interaction                         | Evidence for impact? | Form of impact                                                                                                                                                                                                                                                                                                                                                                                                                                                                                                                                                                                                                                                                                                                                                                                   | Consequences of impact [numerically linked to processes if relevant]                                                                                                                                           | Facilitators                                                                                                                                                                   | Barriers                                                                                                                                                                                                                                                                                 |
|---|----------------------------------------------------------|--------------------------------------------|----------------------|--------------------------------------------------------------------------------------------------------------------------------------------------------------------------------------------------------------------------------------------------------------------------------------------------------------------------------------------------------------------------------------------------------------------------------------------------------------------------------------------------------------------------------------------------------------------------------------------------------------------------------------------------------------------------------------------------------------------------------------------------------------------------------------------------|----------------------------------------------------------------------------------------------------------------------------------------------------------------------------------------------------------------|--------------------------------------------------------------------------------------------------------------------------------------------------------------------------------|------------------------------------------------------------------------------------------------------------------------------------------------------------------------------------------------------------------------------------------------------------------------------------------|
| 1 | Immediately after hearing the story                      | Interaction with researcher                | Yes                  | <ul style="list-style-type: none"> <li>1. Initiation of strongly-felt emotional responses through empathy for narrator (feeling moved, sad, distressed, heartbroken)</li> <li>2. Deepening the recipient's personal understanding of the severity, intensity and complexity of the mental health condition experienced by the narrator</li> <li>3. Decreasing the recipient's stigmatic responses to the mental health condition described by the narrator</li> <li>4. Increasing the recipient's gratitude for positive features of their own life</li> <li>5. Deepening the recipient's understanding of the details of how personal recovery happens</li> <li>6. Feeling connected to narrator</li> </ul>                                                                                     | Initiating personal disclosure to the researcher conducting the interview                                                                                                                                      |                                                                                                                                                                                | <p>Recipient reports general inability to connect with others</p> <p>Recipient has experienced recent distressing event causing temporary inability to connect with others</p> <p>Recipient has strongly-held personal beliefs that contradict those of the narrator</p>                 |
| 2 | Within one week of reading the story                     | NA                                         | Null result          | NA                                                                                                                                                                                                                                                                                                                                                                                                                                                                                                                                                                                                                                                                                                                                                                                               | NA                                                                                                                                                                                                             | NA                                                                                                                                                                             | NA                                                                                                                                                                                                                                                                                       |
| 3 | Undefined                                                | NA                                         | Yes                  | <ul style="list-style-type: none"> <li>1. Providing reassurance that others have experienced similar distress to the narrator</li> <li>2. Engendering hope that recovery is possible</li> <li>3. Providing comfort and support at times of distress through an understanding that recovery is possible</li> <li>4. Providing companionship and support during times of social isolation</li> <li>5. Enhancing the recipient's understanding of the dangers of illness-related behaviours</li> <li>6. Inciting emulation of eating disorder behaviours enacted by narrator</li> <li>7. Triggering of prior ED behaviours matching those of the narrator</li> <li>8. Inciting destructive social comparison with narrator at their worst</li> <li>9. Normalisation of disordered eating</li> </ul> | <p><b>5.</b></p> <p>[Those in recovery]<br/>Greater effort put into avoidance of ED behaviours</p> <p>[Those struggling]<br/>Increases in belief that others are worse off, and hence change not necessary</p> | <p>Recipient recognition of parallels in recovery journey with narrator</p> <p>Memoir details specifics of eating behaviours – facilitator for 6,7,8</p>                       | <p>Recipient not able to relate to narrator's journey of recovery [causing alienation and despair]</p>                                                                                                                                                                                   |
| 4 | At least three months after initial contact with website | Support worker available to discuss videos | Yes                  | <ul style="list-style-type: none"> <li>1. Feeling less alone, in light of feeling alone much of the time</li> <li>2. Feeling connected to the narrator</li> <li>3. Feeling like they belong</li> <li>4. Hearing "hidden" views that are not openly talked about, and recognising them</li> <li>5. Identification of personal behaviours to reconsider</li> <li>5. Promotion of personal reflection</li> </ul>                                                                                                                                                                                                                                                                                                                                                                                    | <p><b>4&amp;5.</b></p> <p>Discussion of behaviours with a support worker</p> <p><b>8.</b></p>                                                                                                                  | <p>Life circumstances and events in the narrative matched their own [deepens resolve to continue]</p> <p>Hearing others describe thoughts which are not normally discussed</p> | <p>Avoidance of particular videos due to content being personally challenging</p> <p>Prior experience of providing on-line peer support [empathic response to narrator makes consumption of video tiring]</p> <p>Recipient not able to relate to narrator's journey of recovery [but</p> |

|   |                                      |  |     |                                                                                                                                                                                                                                                                                                                                    |                                                           |                                                                                                                                                            |                                                                                                                                                                   |
|---|--------------------------------------|--|-----|------------------------------------------------------------------------------------------------------------------------------------------------------------------------------------------------------------------------------------------------------------------------------------------------------------------------------------|-----------------------------------------------------------|------------------------------------------------------------------------------------------------------------------------------------------------------------|-------------------------------------------------------------------------------------------------------------------------------------------------------------------|
|   |                                      |  |     | 6. Feeling inspired<br>7. Understanding the spectrum of views around mental illness<br>8. Learning from the actions of narrators<br>9. Increase in belief that recovery is possible<br>10. Feeling less ashamed about having a mental illness                                                                                      | Being more forceful when talking about medication with GP | [supports feeling less alone]<br><br>Being able to consume videos in private if desired<br><br>Having a support worker to facilitate use of the technology | fell back onto other areas of the website so little negative impact]<br><br>Lack of access to internet technology at home                                         |
| 5 | Within one year of taking the course |  | Yes | 1. Comparing themselves to the narrator, and finding that they are doing well<br>2. Feeling out of place, as they have experienced significant distress, and the problems of the narrator feel insignificant<br>3. Feeling compelled to make personal changes after hearing a recovery narrative from someone they could relate to |                                                           | Narrator and recipient share similarities in experiences.                                                                                                  | The recipient feels significantly worse off than the narrators [e.g. they have experienced more profound difficulties], causing them to hold back from connection |

## Reference search strategy

| Clause | Definition                                                                                                                                                                                                                                                                                                                       |
|--------|----------------------------------------------------------------------------------------------------------------------------------------------------------------------------------------------------------------------------------------------------------------------------------------------------------------------------------|
| 1      | exp Mental disorders/                                                                                                                                                                                                                                                                                                            |
| 2      | exp Mental health/                                                                                                                                                                                                                                                                                                               |
| 3      | (psych* health or psych* illness or psych* problem* or psych* disorder or "mad" or madness or mental distress or emotional distress or trauma).ti,ab.                                                                                                                                                                            |
| 4      | 1 OR 2 OR 3                                                                                                                                                                                                                                                                                                                      |
| 5      | exp "quality of life"/                                                                                                                                                                                                                                                                                                           |
| 6      | Rehabilitation/                                                                                                                                                                                                                                                                                                                  |
| 7      | (Recover* or transform* or meaning* or resilien* or surviv* or thrive* or hope* or cope or coping or endure* or overcome* or rebuild* or journey).ti,ab.                                                                                                                                                                         |
| 8      | 5 OR 6 OR 7                                                                                                                                                                                                                                                                                                                      |
| 9      | (narrat* or story* or stories or telling or tale* or account* or restory* or "alternative narrative" or "counter-narrative" or disnarrat* or memoir* or blog* or vlog* or biograph* or auto-ethnograph* or "narrative porn" or forum or "discussion board" or "personal experience" or "lived experience" or "new media").ti,ab. |
| 10     | (hear* or listen* or read* or tell* or shar* or disclos* or told or view* or watch* or "personal contact" or "social contact").ti,ab.                                                                                                                                                                                            |
| 11     | 4 AND 8 AND 9 AND 10                                                                                                                                                                                                                                                                                                             |
